# Supplementary material for: TOR Complex 2-Regulated Protein Kinase Fpk1 Stimulates Endocytosis via Inhibition of Ark1/Prk1-Related Protein Kinase Akl1 in Saccharomyces cerevisiae
Source: PubMed Central journal article supplement (PMC5359421; doi:10.1128/mcb.00627-16), 2017-03-17
Supplement: MCB.00627-16_zmb999101447s1.pdf [file MCB.00627-16_zmb999101447s1.pdf]

# Supplemental Figure 1

Sce MSITNGTSRSVSAMGHPAVERYTPGHIVCVGTHKVEVVNYLAEGGFAQIYVVKFLEYLNEFDNTASV-PLKIGDVAACLKRVLVQDENGLNEMRNEVEVMKKLKGAPNIVQYFD  
Spa MSITNGTSRSVSAMGHPAVERYTPGHIVCVGTHKVEVVNYLAEGGFAQIYVVKFLEYLNEFDNTASV-PLKIGDVAACLKRVLVQDENGLNEMRNEVEVMKKLKGAPNIVQYFD  
Sku MSITNGTSRSVSAMGHPAVERYTPGDIVCVGTHKVEIVNYLAEGGFAQIYVVKFLEYLNEFDNAASV-PLKIGDLACLKRVLVHIDENGLNEMRNEVEVMKKLKGAPNIVQYFD  
Smi MSITNSTSRVSAMGHPAVERYTPGHIVCVGTHKVEIVNYLAEGGFAQIYVVKFLEYLNEFDNAASV-PLKIGDVAACLKRVLVQDENGLNEMRNEVEVMKKLKGAPNIVQYFD  
Sba MSITNGTSRSVSAMGHPAVERYTPGKIVCVGTHKVEIVNYLAEGGFAQIYAVVKFLEYLNEFDNTASL-PLKIGDVAACLKRVLVHIDENGLNEMRNEVEVMKKLKGAPNIVQYFD  
Sar MSITNGTSRSVSAMGHPAVERYTPGHIVCVGAHKVEVVNYLAEGGFAQIYVVKFLEYLNEFDNTASV-PLKIGDVAACLKRVLVHIDENGLNEMRNEVEVMKKLKGAPNIVQYFD  
Sca MSTTSGPVSNNNTTVKPNNERYPGTQVAVGAHKVEIIKYIAEGGFAQIYAVKFIIEFLNEFENNRMKPKLQMGDVAACLKRVLVQDENGLNEMRNEVEVMKQLQGAPNIVQYFD  
Cgl MERPN--SRSMTSLNSPNEEKYPNGOMISVGAHRVEIVSYLAEGGFAQIYVVKFVEYLNEFESLGSKSAITVGDIAACLKRVIVNDEMGLNEMRNEVEVMKKLKSSPNIVQYFD  
Ago MSKRH (11) PGTGALTGPLEMLQAGSTVLVGVHQUEVIEYLAEGGFAHIYKVSFVGYTNELD-RQDR-ILQPGDTVCLKRVRVSDENGLNELRNEVEVMKKLRNCSNIVQYFD  
Sk1 MANS (14) SASSASPTLEKLPGLIIVGSHKVEIVKYLAEGGFAHIYVVKFVEFSNELE-TPSS-SLKEGDLACLKRVLVTDENGLNELRNEVEVMKQLKNSDNIVQYFD  
Kwa M-ITG (54) SSRSGTLPVLEQLKTGSQVIVGNHRVEIVKYLAEGGFAHIYVVRFIEYANELEQVPTI-KLEVGDIAACLKRVLVTDENGLNEMRNEVSMKQLSGCPNIVQYFD  
Kla MS (12) HTAATSAM-IPNSHLLSPNTQVVVGTHRCEILEHLAEGGFANIYKVKFLELTNEMDAGIDSKLLKAGDIAACLKRVIVPDEENGLNELRNEVEVMKQLRGSPNIVQYFD

Sce SNASRRRDGVQGFVLLLMELCPNKSLLDYMNQRLSTKLTEAEIVKIMYDVALSISQMHYLPVSLIHRDIKIENVLVDAKNNFKLADFGSTSTCFPIVTTTHQDIALLTQNIYV  
Spa SNASRRRDGVQGFVLLLMELCPNKSLLDYMNQRLSTKLTESEIVKIMYDVALSISQMHYLPVPLIHRDIKIENVLVDAKNNFKLADFGSTSTCFPIVTTTHQDIALLTQNIYV  
Sku SNASRRRDGVQGFVLLLMELCPNKSLLDYMNQRLSTKLTESEIVKIMYDVVLSISQMHYLPVPLIHRDIKIENVLVDAKNNFKLADFGSTSTCFPIVTTTHQDIALLTQNIYV  
Smi SNASRRRDGVQGFVLLLMELCPNKSLLDYMNQRLSTKLTESEIVKIMYDVVLSISQMHYLPVPLIHRDIKIENVLVDAKNNFKLADFGSTSTCFPIVTTTHQDIALLTQNIYV  
Sba SNASRRRDGVQGFVLLLMELCPNKSLLDYMNQRLSTKLSESEIVKIMYDVALSISEMHYLPVPLIHRDIKIENVLVDAENNFKLADFGSTSTCFPIVTTTHQDIALLTQNIYV  
Sar SNASRRRDGVQGFVLLLMELCPNKSLLDYMNQRLSTKLTESEIVKIMYDVALSISEMHYLPVPLIHRDIKIENVLVDGENNFKLADFGSTSTCFPIVTTTHQDIALLTQNIYV  
Sca SNASRRHNGFPGFVLLLMELCPNKSLLDYMNQRLATKLTEKEILKIMYDVYAVSOMHYLPTPLIHRDIKIENVLVDAQNNFKLADFGSTSTCFPIVTTTHQDIAVLTQNIYV  
Cgl SNASRRIDGKPGGFVLLLMELCPNKSLLDYMNQRLKTKLSESEILKIMYDVSIKSNMHYLDQPLIHRDIKIENVLVDAKNNFKLADFGSTSTCFPIVTTTHQDIAVLTQNIYV  
Ago SNASRLGDGKPGGFVLLLMELCPNKSLLDYMNQRLATKLTSEAEVLKIMYDITVGLSHMHYQRTPLIHRDIKIENVLVDAKNNFKLADFGSTSTCFPIVTTTHQDIAVLTQNIYV  
Sk1 SNASRRRDGSPGYEVLLLMELCPNKSLLDYMNQRLATKLTSEKEVLKIMYDVTKAVAQMHFLPTPLIHRDIKIENVLVDSENNFKLADFGSTSTCFPIVTTTHQDIALLTQNIYV  
Kwa SHASRRDGSSEGFVLLLMELCPNKSLLDYMNQRLATKLTSEQEILKIMYDVTTRALAQMHYLPVPLIHRDVKIENVLVDAKNNFKLADFGSTSTCFPIVTTTHQDIAVLTQNIYV  
Kla SNASRHPDGSSEGFVLLLMELCPNKSLLDYMNQRLATKLTTEAEILKIMYDVSNATIAQMHYLPVPLIHRDIKIENVLVDKDDNFKLADFGSTSTCFPIVTTTHQDIAVLTQNIYV

Sce HTTPQYRSPEMIDLRYRCLPINEKSDI WALGIFLYKLLFFTTTPFEMTGQFMAILHSHKYEFVVKYSSKLINLI IIMLAENPNLRPNYQVLYHLC EILNVEVP IEDKYAEGAYNF  
Spa HTTPQYRSPEMIDLRYRCLPINEKSDI WALGIFLYKLLFFTTTPFEMTGQFMAILHSHKYEFVVKYSSKLINLI IIMLAENPNLRPNYQVLYHLC EILNVEVP IEDKYTEGAYNF  
Sku HTTPQYRSPEMIDLRYRCLPINEKSDI WALGIFLYKLLFFTTTPFEMTGQFMAILHSHKYEFVVKYSSKLINLI IIMLAENPNLRPNYQVLYHLC EILNVEVP IEDKYAEGAYNF  
Smi HTTPQYRSPEMIDLRYRCLPINEKSDI WALGIFLYKLLFFTTTPFEMTGQFMAILHSHKYEFVVKYSSKLINLI IIMLAENPNLRPNYQVLYHLC EILNVEVP IEDKYTEGAYNF  
Sba HTTPQYRSPEMIDLRYRCLPINEKSDI WALGIFLYKLLFFTTTPFEMTGQFMAILHSHKYEFVVKYSSKLINLI IIMLAENPNLRPNYQVLYHLC EILNVEVP IEDKYSEGAYDF  
Sar HTTPQYRSPEMIDLRYRCLPINEKSDI WALGIFLYKLLFFTTTPFEMTGQFMAILHSHKYEFVVKYSSKLINLI IIMLAENPNLRPNYQVLYHLC EILNVEVP IEDKYVEGAYNF  
Sca HTTPQYRSPEMIDLRYRCLPINEKSDI WALGIFLYKLLFFTTTPFEMTGQFMAILHSHKYEFVVKYSSKLINLI IIMLAENPNLRPNYQVLYHLC EILNVEVP IEDKYAEGPYDF  
Cgl HTTPQYRSPEMIDLRYRCLPINEKSDI WALGIFLYKLLFFTTTPFEMTGQFMAILHSHKYEFVVKYSSKLINLI IIMLAENPNLRPNYQVLYHLC EILNVEVP IEDKYGLGYPNF  
Ago HTTPQYRSPEMIDLRYRCLPINEKSDI WALGIFLYKLLFFTTTPFEMTGQFMAILHSHKYEFVVKYSSKLINLI IIMLAENPNLRPNYQVLYHLC EILNVEVP IEDKYGLGYPNF  
Sk1 HTTPQYRSPEMIDLRYRCLPINEKSDI WALGIFLYKLLFFTTTPFEMTGQFMAILHSHKYEFVVKYSSKLINLI IIMLAENPNLRPNYQVLYHLC EILNVEVP IEDKYGLGYPNF  
Kwa HTTPQYRSPEMIDLRYRCLPINEKSDI WALGIFLYKLLFFTTTPFEMTGQFMAILHSHKYEFVVKYSSKLINLI IIMLAENPNLRPNYQVLYHLC EILNVEVP IEDKYGLGYPNF  
Kla HTTPQYRSPEMIDLRYRCLPINEKSDI WALGIFLYKLLFFTTTPFEMTGQFMAILHSHKYEFVVKYSSKLINLI IIMLAENPNLRPNYQVLYHLC EILNVEVP IEDKYGLGYPNF





```

Sce  NDSPAPNSHHSYRVSPHASTAITENKRHSTGHELSTRSNKGKETHRTGSKORHDLERYRHSKDKDSNSSITISTSTPSEMRKSFARARQSLDDLERVREAMAS--SASSSGGS
Spa  NDSSAPOPPHHSYRVPPHASTAISENKRHSTGHELSTRSSKGKETHRTGSKORHDLERYRQSKDKDSNSSITISTSTPSEMRKSFARARQSLDDLERVREAMAS--NGSNSGGS
Sku  NDSSAPOSHHSYRVPPHTSTAISENKRHSTGHDSSTRLSAKHEAHRTSSKPRHDLERYRQSKDRDSNSSITISTSTPSEMRKSFARARQSLDDLERVRETMAS--NGTSSSGGS
Smi  NESLAPOSHHSYRAPSHASTAISENKRHSTGHELSTRSTGKQDTHRTSSKORHDLERYRHSKDKDSNSSITISTSNSSEMRKSFARARQSLDDLERVREAMAS--NGSSSGGS
Sba  TGSPAPOSHHSYRPPHSTTISENKRHSTGHE-STRSSKGKEMHRTNSKPRHDLERYRQSKDRDSNSSITISTSTPSEMRKSFARARQSLDDLERIRREATTANNGS----GS
Sar  NDSQASQSHHSYRGPPHSTTIMTENKRHSTGHE-STRSSKGKETHRTNSKPRHDLERYRQSKDRDSNSSITISTSTPSEMRKSFARARQSLDDLERVREAMASSG--SGSGSS
Sca  STSVHHISSIRE ( 19 )OROQPRHHQHTFDSSSNLNSKGANRSSSRGNIRGKODLESYKHSTKNNSSSIPISTTNTNEMKKSFAKARQSLDDLERVREALL-----NSD
Cgl  NTHRPGIKGMS ( 20 )QSSKVISOSTNARISLDRQRORHIEPRDSKSRSRS-HGLEEY-TSSNG-SNSSINISTSNKFEMKRSFAKARQSLDDLERARRDAM----SRSNSGHE
Ago  -----PVSASKTSSKAHLQPNRSGTANCGTSN-----SSSVVSGVRKSFHRGRKSVDLDVSKE-----SKEPTNSG--
Skl  -----PKESSQRHQHKESSORHQHKKI-----PSS-SEMRKSLSRARKSLDLEGVKRE-----SAGGSD-T
Kwa  -----PDIKLQTKTKVSHQOR-----KSNVAAEPPKSFSRARKSLDLERTKRD-----TPSNGENT
Kla  -----KTSF-----SRTSVRRSVEMERMKHDSNSTSNSNARDETK

```

```

Sce  NGKRRSFFSVFRSEK.
Spa  NGKRRSFFSVFRSEK.
Sku  SGKRRSFFSVFRSEK.
Smi  NGKRRSFFSVFRSEK.
Sba  SGKRRSIFSVFRSEK.
Sar  G GKRRSIFSVFRSEK.
Sca  NGKRRSIFSMFRGDKK.
Cgl  TGKRKSLFSMFK.
Ago  SGKRRSIFGVFKS.
Skl  TSKRKSFFGVFKS.
Kwa  SSKRKSFFGGFKG.
Kla  ETKRRSFFGVFK.

```

**Figure S1.** Comparison of Alk1 orthologs from twelve yeast species. The amino acid sequence of *Saccharomyces cerevisiae* Alk1 (top line) was aligned with the primary structures of the Alk1 orthologs from eleven other yeast species, including the *sensu stricto* group, *Saccharomyces paradoxus* (Spa), *Saccharomyces kudriavzevii* (Sku), *Saccharomyces mikatae* (Smi), *Saccharomyces bayanus* (Sba), and *Saccharomyces arboricola* (Sar), as well as more divergent species, *Saccharomyces castellii* (Sca), *Candida glabrata* (Cgl), *Ashbya gossypii* (Ago), *Saccharomyces kluyveri* (Sk1), *Kluveromyces waltii* (Kwa), and *Kluveromyces lactis* (Kla). As a means to emphasize their degree of relatedness to *S. cerevisiae* Alk1, only identities between the indicated ortholog and *S. cerevisiae* Alk1 are indicated (white letters on black boxes). Gaps (hyphens), as well as the positions of insertions of the indicated length (in parentheses), introduced to maximize the alignment in certain regions are also indicated. Period (.) indicates the end of the open-reading-frame. Matches to the consensus Fpk1 phospho-acceptor site motif (-R-x-S-L/V/I-D/E-) (yellow boxes with phosphorylation site in bold red); additional site in, respectively, Sca and Clg (yellow underline). The sources of the sequences shown were: Sce, strain S288C from the *Saccharomyces* Genome Database (<http://www.yeastgenome.org/locus/S000000263/protein>); Spa, strain CBS432 derived from the data of Liti *et al.* (2009) and Bergström *et al.* (2014); Sku, Smi, Sba, Sca and Sk1 as reported by Cliften *et al.* (2003) and Kellis *et al.* (2003); Sar from GenBank entry EJS44833.1; and, Cgl, Ago, Kwa and Kla from the Fungal Orthogroups database at the Broad Institute ([https://portals.broadinstitute.org/cgi-bin/regev/orthogroups/show\\_orthogroup.cgi?orf=YBR059C](https://portals.broadinstitute.org/cgi-bin/regev/orthogroups/show_orthogroup.cgi?orf=YBR059C)).

## SUPPLEMENTAL REFERENCES

Bergström A, Simpson JT, Salinas F, Barré B, Parts L, Zia A, Nguyen Ba AN, Moses AM, Louis EJ, Mustonen V, Warringer J, Durbin R, Liti G (2014) A high-definition view of functional genetic variation from natural yeast genomes. *Mol. Biol. Evol.* **31**: 872-888.

Cliften P, Sudarsanam P, Desikan A, Fulton L, Fulton B, Majors J, Waterston R, Cohen BA, Johnston M (2003) Finding functional features in *Saccharomyces* genomes by phylogenetic footprinting. *Science* **301**: 71-76.

Kellis M, Patterson N, Endrizzi M, Birren B, Lander ES (2003) Sequencing and comparison of yeast species to identify genes and regulatory elements. *Nature* **423**: 241-254.

Liti G, Carter DM, Moses AM, Warringer J, Parts L, James SA, Davey RP, Roberts IN, Burt A, Koufopanou V, Tsai IJ, Bergman CM, Bensasson D, O'Kelly MJ, van Oudenaarden A, Barton DB, Bailes E, Nguyen AN, Jones M, Quail MA, Goodhead I, Sims S, Smith F, Blomberg A, Durbin R, Louis EJ (2009) Population genomics of domestic and wild yeasts. *Nature* **458**: 337-341.
